# Supplementary material
Source: Springer Nature journal article supplement (https://www.springermedizin.de/resource/supplementary/13044_2010_26_MOESM1_ESM.pdf/9659980)

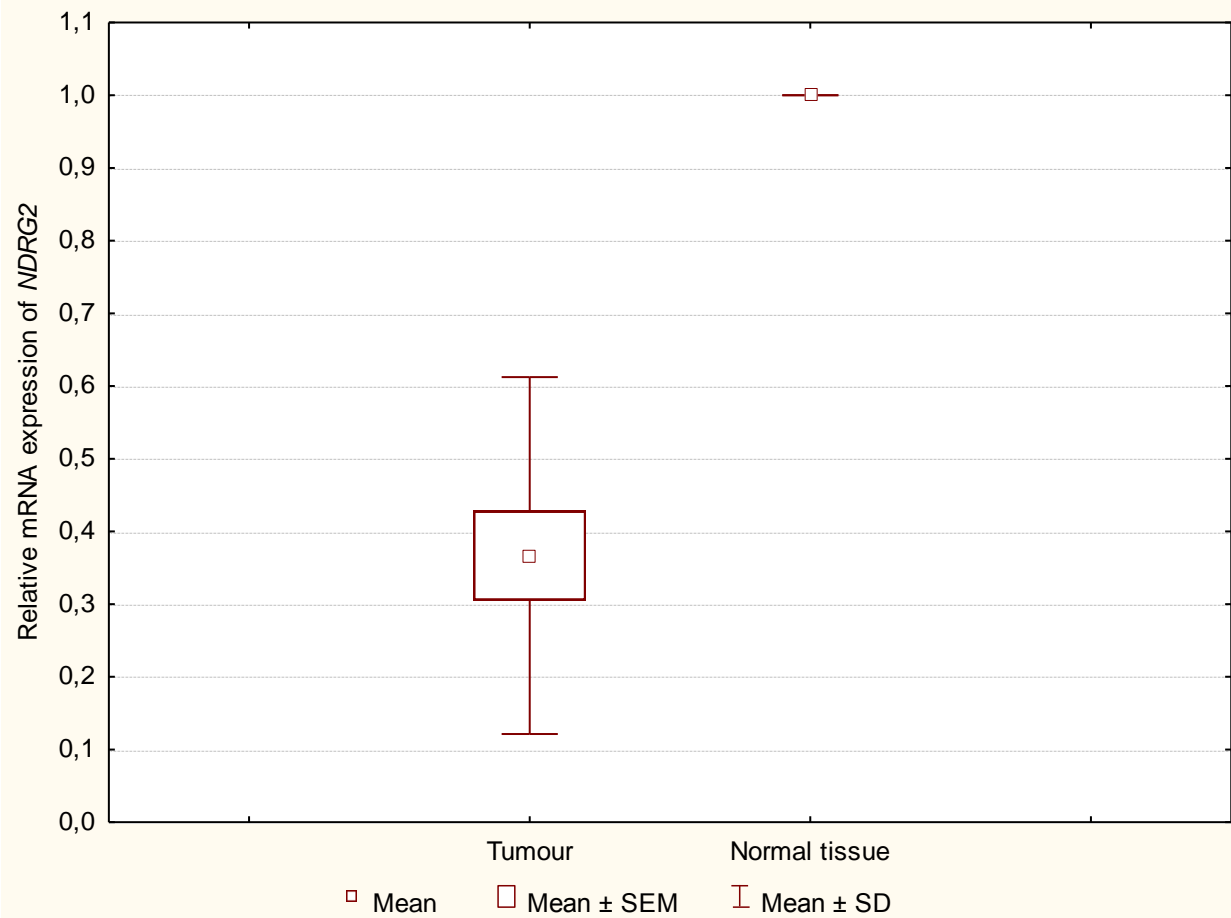

Supplement: MOESM1 [file 9659980]
